# Supplementary material
Source: MDPI journal article supplement (https://www.mdpi.com/1424-2818/14/12/1127)
Supplement: s1 [file s1]

Table S1. Morphological comparison of new species and congeners in *similis*-group.

| <i>similis</i> -group                           | Body length | A1 1st/2nd seg length | Setal formulae (exp / enp) |                   |                   |                   |     |
|-------------------------------------------------|-------------|-----------------------|----------------------------|-------------------|-------------------|-------------------|-----|
|                                                 |             |                       | P1                         | P2                | P3                | P4                | P5  |
| <i>R. brevipes</i> (Wells & Rao, 1987)          | 410         | 1                     | 0.0.022 / 1.1.111          | 0.1.123 / 0.2.121 | 0.1.123 / 1.1.121 | 0.1.223 / 1.1.121 | 4/5 |
| <i>R. diversa</i> (Lang, 1965)                  | 600         | 0.97                  | 0.0.022 / 1.1.111          | 0.1.123 / 1.2.121 | 0.1.123 / 1.1.221 | 0.1.223 / 1.1.121 | 5/6 |
| <i>R. falklandiensis</i> (Lang, 1936)           | 698         | -                     | 0.0.022 / 1.1.111          |                   |                   |                   | 5/6 |
| <i>R. hopkinsi</i> (Lang, 1965)                 | 700         | 0.88                  | 0.0.022 / 1.1.111          | 0.1.123 / 1.2.121 | 0.1.123 / 1.1.221 | 0.1.223 / 1.1.121 | 5/6 |
| <i>R. remanei</i> (Klie, 1950)                  | 450         | -                     | 0.0.022 / 1.0.111          |                   |                   |                   | 5/6 |
| <i>R. simulans</i> (Norman & Scott T., 1905)    |             | 0.63                  | 0.0.022 / 1.1.111          | 0.1.123 / 1.2.121 | 0.1.123 / 1.1.221 | 0.1.223 / 1.1.121 | 5/6 |
| <i>R. smithi</i> (Hamond, 1973)                 | 730         | 0.86                  | 0.0.022 / 1.1.111          | 0.1.123 / 1.2.121 | 0.1.123 / 1.1.221 | 0.1.223 / 1.1.121 | 5/6 |
| <i>R. similis similis</i> (Scott A., 1896)      |             | 1                     | 0.0.022 / 1.1.111          |                   |                   |                   | 5/6 |
| <i>R. similis bulbamphiascoides</i> Noodt, 1955 |             | 0.38                  | 0.0.022 / 1.1.111          | 0.1.123 / 1.2.121 | -                 | 0.1.223 / 1.1.121 | 5/6 |
| <i>R. donghaensis</i> Bang, 2021                | 795         | 0.39                  | 0.0.022 / 1.1.111          | 0.1.123 / 1.2.121 | 0.1.123 / 1.1.221 | 0.1.223 / 1.1.121 | 5/6 |
| <b><i>R. jejuensis</i> sp. nov.</b>             | 875         | 0.69                  | 0.0.022 / 1.1.111          | 0.1.123 / 1.2.121 | 0.1.123 / 1.1.221 | 0.1.223 / 1.1.121 | 5/6 |

Continued.

| <i>similis</i> -group               | P5                          |                                     |                                               |                                |            |                    |
|-------------------------------------|-----------------------------|-------------------------------------|-----------------------------------------------|--------------------------------|------------|--------------------|
|                                     | P5 benp distal setae length | Gap between P5 benp seta II and III | Ornamentation between P5 benp seta II and III | P5 exp distal margin           | P5 exp l/b | P5 exp outer setae |
| <i>R. brevipes</i>                  | I<II (2/5)                  | normal                              | absent                                        | normal                         | 2          | naked              |
| <i>R. diversa</i>                   | I<II (4/5)                  | wide                                | present                                       | normal                         | 1.5        | pinnate & naked    |
| <i>R. falklandiensis</i>            | I<II (4/5)                  | normal                              | absent                                        | normal                         | 1.5        | naked              |
| <i>R. hopkinsi</i>                  | I<II (2/5)                  | wide                                | present                                       | normal                         | 1.5        | pinnate & naked    |
| <i>R. remanei</i>                   | I<II (1/4)                  | normal                              | absent                                        | normal                         | 2.5        | naked              |
| <i>R. simulans</i>                  | I<II (3/5)                  | narrow                              | absent                                        | normal                         | 2.5        | naked              |
| <i>R. smithi</i>                    | I<II (2/3)                  | wide                                | absent                                        | swollen distal margin (II-III) | 1.5        | naked              |
| <i>R. similis similis</i>           | I<II (almost same)          | normal                              | absent                                        | normal                         | 2          | pinnate            |
| <i>R. similis bulbamphiascoides</i> | I<II (1/4)                  | normal                              | absent                                        | normal                         | 2          | bulb               |
| <i>R. donghaensis</i>               | I=II                        | normal                              | absent                                        | swollen distal margin (II-III) | 2          | naked              |
| <b><i>R. jejuensis</i> sp. nov.</b> | I<II (1/2)                  | Wide                                | present                                       | normal                         | 1.7        | pinnate            |

Continued.

| <b><i>similis-group</i></b>             | P1<br>exp/enp-1 | P1 enp-1<br>inner seta<br>length | P2 exp-2<br>inner<br>margin<br>setules | P3 enp:<br>exp | P6 setae<br>length (2<br>outer setae) | Caudal rami                             |
|-----------------------------------------|-----------------|----------------------------------|----------------------------------------|----------------|---------------------------------------|-----------------------------------------|
| <i>R. brevipes</i>                      | 5/4             | end of enp-2                     | present                                | enp>exp        | 2A=B                                  | without<br>ornamentation                |
| <i>R. diversa</i>                       | 3/4             | mid of enp-3                     | present                                | enp>exp        | 3A=B                                  | inner margin<br>ornamentation           |
| <i>R. falklandiensis</i>                | 4/5             | mid of enp-3                     |                                        |                |                                       |                                         |
| <i>R. hopkinsi</i>                      | 1               | 2/3 of enp-3                     | present                                | enp>exp        | 2A=B                                  | inner margin<br>ornamentation           |
| <i>R. remanei</i>                       | 2/3             | end of enp-2                     |                                        |                | -                                     | without<br>ornamentation                |
| <i>R. simulans</i>                      | 1               | mid of enp-3                     | present                                | enp=exp        | -                                     | inner distal<br>margin<br>ornamentation |
| <i>R. smithi</i>                        | 4/5             | mid of enp-3                     | present                                | enp>exp        | 2 setae (?)                           | inner distal<br>margin<br>ornamentation |
| <i>R. similis similis</i>               | 4/5             | end of enp-3                     |                                        |                | -                                     | inner distal<br>margin<br>ornamentation |
| <i>R. similis<br/>bulbamphiascoides</i> | 4/5             | 1/4 of enp-3                     | present                                | -              | -                                     | without<br>ornamentation                |
| <i>R. donghaensis</i>                   | 2/3             | 1/4 of enp-3                     | absent                                 | enp=exp<br>(*) | 2A=B                                  | inner distal<br>margin<br>ornamentation |
| <b><i>R. jejuensis sp. nov.</i></b>     | 3/4             | mid of enp-3                     | present                                | enp<exp        | 3A=B                                  | inner margin<br>ornamentation           |

\*In original description, "enp>exp". As a result of observation of the paratype, the lengths are similar.
